# Supplementary material for: Fluoroalkyl ether electrolyte with redefined in-cell ion affinity upgrades rate performances of lithium ion batteries
Source: Research Square preprint supplement (doi:10.21203/rs.3.rs-108440/v1), 2020-12-04
Supplement: Supplementary file 1 [file ef91f2e8975c67c3480766d1.docx]

**Fluoroalkyl ether electrolyte with redefined in-cell ion affinity upgrades rate performances of lithium ion batteries**

**Experimental section**

**Preparation of THE-based electrolytes.** The LiTFSI was dried under vacuum at 60 °C for 12 h. A mixed solvent of DME/DOL (v/v=1:1) was prepared. THE-based electrolytes were composed of 1 M LiTFSI dissolved in THE/DOL/DME. More specifically, 1 M LiTFSI was dissolved in a mixture of DOL/DME (v/v=1:1) and THE with different volume ratios of 20%, 40%, 45%, 50%, 55%, 60%, 65%, 70%, 75%, and 80% (THE, vt.%).

**Characterization.** The morphology of Li anodes after cycling in various electrolytes was characterized with SEM measurements (Zeiss Supra, Germany). The elemental content was analyzed with mapping. The Li anodes after cycling in various electrolytes were studied by XPS (Thermo-Fisher, ESCALAB 250Xi, U.S.A.). Fourier transform infrared spectroscopy (FTIR) instrument (Nicolet, is50, U.S.A.) was conducted to study the Li anodes surface properties. Electrolyte viscosity was measured using a rheometer (Waters, VIS403039900, U.S.A.). The contact angle of the electrolytes on separator was tested by an automatic contact angle measuring instrument (ZhongChen, JC2000D3M, China).

The Li+ transference number was defined as the equation (Equation (1)).

= (1)

where is the mobility of Li+ and is the mobility of TFSI-.

The conductivity inside electrolyte was defined as the equation (Equation (2)).

*+*  (2)

where are the numbers of anion and cation per unit volume, respectively, and are the mobilities of anion and cation, respectively, and is electronic charge.

The conductivity of electrolyte/anode interface in the 60%THE electrolyte was defined as the equation (Equation (3)).

(3)

where is the ion conductivity of electrolyte/anode interface in commercial electrolyte,is the ion conductivity of LiF and 𝛼 denotes the increased ratio of F element after introducing THE.

The Li+ transference number for various electrolytes was studied with Nyquist plot. Re, Rint, and RD represent the resistances of electrolyte, interface and diffusion, respectively. was calculated according to the equation (Equation (4)).

(4)

The equation (Equation (5)) of the conductivity inside electrolyte was given:

(5)

where *L* is the thickness of the separator and *S* is the area of the electrode.

**Electrochemical measurements.** For the fabrication of electrodes, active substance (LFP, LCO, NCM523, NCM811, and LTO), conductive carbon, and binder (PVDF in N-methyl pyrrolidone (NMP)) were mixed with a weight ratio of 8:1:1. 90 wt.% graphite, 5 wt.% conductive carbon and 5 wt.% binder (2.5 wt.% sodium carboxymethyl cellulose and 2.5 wt.% styrene-butadiene rubber) constituted graphite anode. The cathode slurry was coated on aluminum foil and dried at 60 ºC for 12 h. The anode slurry was coated on copper foil and dried at 80 ºC for 12 h. The resultant electrodes were cut into a circular sheet of 14 mm in diameter (In full cells, LCO, LFP, NCM523 and NCM811 electrodes were cut into a circular sheet of 12 mm in diameter). The loading mass of the regular LFP electrodes was 0.72-1.08 mg cm−2. The loading mass of the high-loading LFP electrodes was 13.00-13.67 mg cm-2. The loading mass of the LTO electrodes was 10.16-11.52 mg cm-2. The loading mass of the LCO electrodes was 11.17-11.35 mg cm−2. The loading mass of the NCM523 electrodes was 14.71-14.86 mg cm−2. The loading mass of the NCM811 electrodes was 12.71-12.79 mg cm−2. The loading mass of the graphite electrodes was 4.28-7.51 mg cm−2. For all full cells, the capacity ratio of the negative to the positive electrodes (N/P ratio) was set to 1.05. The LIBs were tested in 2035 coin-type cells. The amount of electrolyte used was 45 μL (For the high-loading electrodes, the amount of electrolyte used was 75 μL). The separator was Celgard 2500 with the diameter of 16 mm. Galvanostatic measurements were performed on the battery testing system (Neware, CT-3008), within the voltage range of 2.5-4.2 V (*vs* Li+/Li) for Li/LFP cells, within the voltage range of 1.0-2.5 V (*vs* Li+/Li) for Li/LTO cells, within the voltage range of 2.5-3.8 V (*vs* Li+/Li) for graphite/LFP cells, within the voltage range of 0.5-2.8 V (*vs* Li+/Li) for LTO/LFP cells, within the voltage range of 3.0-4.4 V (*vs* Li+/Li) for graphite/LCO cells, within the voltage range of 3.0-4.6 V (*vs* Li+/Li) for graphite/NCM523 cells, and within the voltage range of 2.5-4.3 V (*vs* Li+/Li) for graphite/NCM811 cells.

***In-situ* Raman Spectroscopy.** *In-situ* Raman measurements were taken by Renishaw InVia Raman microscopy with a 532 nm laser, which irradiates the electrolyte though modified negative case and Li metal foil with a 5 mm hole. The batteries were assembled in an argon-filled DELLIX glove box with oxygen and water levels both below 0.1 ppm. After aging treatment, galvanostatic measurements were performed at 0.2 C within the voltage range of 2.5-4.2 V for Li/LFP cells while the Raman signals were recorded simultaneously. The peaks of the spectra were normalized by subtracting the baseline.

**DFT calculations.** The HOMO and LUMO values of DOL, DME and THE molecules were calculated with Dmol3 package. The absorption energy of electrolyte and separator was calculated using DFT implemented with the Cambridge Serial Total Energy Package (CASTEP). To prove the better wettability, the binding configurations of THE-CH2CHCH3, DOL-CH2CHCH3 and DME-CH2CHCH3 were built and calculated. The adsorption energy was calculated with the equation: , where *E* is the adsorption energy, andis the total energy of the relaxed a and b models at the equilibrium state. andare the self-consistent field (SCF) calculation energy values of geometry-optimized a and b models. Electron exchange correlation was constructed by Perdew-Burke-Ernzerhof (PBE) function with generalized gradient approximation (GGA). The energy barriers for the C-F bond cleavage of THE, TTEE and TTRE were identified by securing the state between the reactant and the product.

**AIMD calculations.** Three electrolyte cells- a single LiPF6 molecule dissolved in 7 EC and 7 DMC molecules, a single LiTFSI molecule dissolved in 5 DME and 7 DOL molecules, and a single LiTFSI molecule dissolved in 2 DME, 3 DOL and 4 THE molecules- were constructed in periodic boxes. We performed the AIMD calculation using the VASP package to understand Li+ diffusion behavior. The ion–electron interaction was described with the projector augmented wave method, and the exchange-correlation energy was described by the functional of the Perdew–Burke–Ernzerhof form of the generalized gradient approximation. The plane wave energy cut-off of 400 eV was chosen and a minimal Г-centred 1 × 1 × 1 k-point grid was used. All molecular dynamics simulations were performed in the NVT ensemble using a Nosé−Hoover thermostat. Each system was heated to 300 K and equilibrated for 10 ps and then simulated for 30 ps to obtain statistics.

Constrained AIMD simulations were also performed on the electrolyte/electrode systems to understand rate performance. The deposited Li (0 0 1)/electrolyte interfaces were modelled by packing the DOL, DME and THE in the deposited Li (0 0 1) box, respectively. In these simulations, a slow-growth method was used, in which a Li+ within the electrolyte was chosen and constrained to a position from the deposited Li (0 0 1) surface. The force required to constrain the Li+ at this particular position was monitored. The procedure was repeated every 3.0×10-5 Å for approaching from the electrolyte to the surface, and the free energy of the system can be obtained by integrating the position dependent mean constraint force.


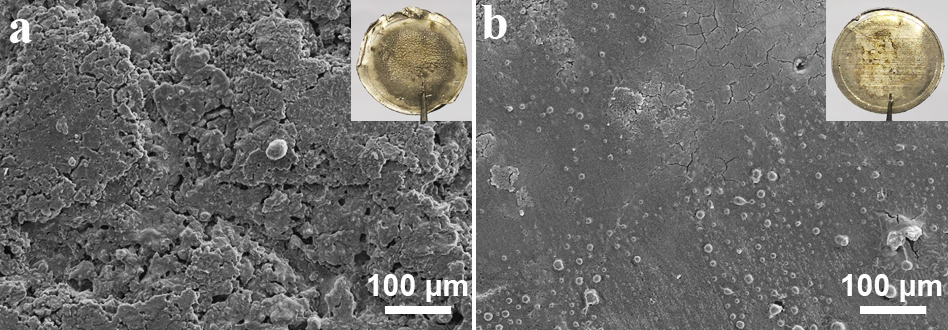


**Supplementary Figure 1 |** SEM images of the Li metals in (**a**) DOL+DME and (**b**) 60%THE electrolytes after 100 cycles.


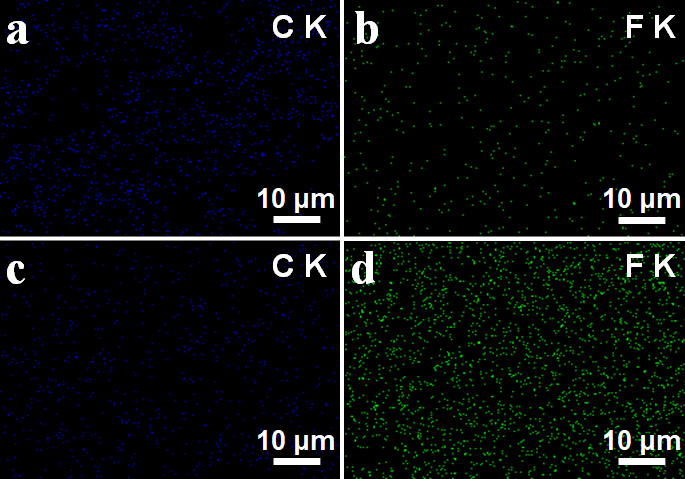


**Supplementary Figure 2 |** Energy-dispersive spectroscopy (EDS) test for the elemental mapping of (Figs. 1c and 1g) Li anodes in (a and b) DOL+DME and (c and d) 60%THE electrolytes after cycling. Elements of C and F are shown in the mapping.


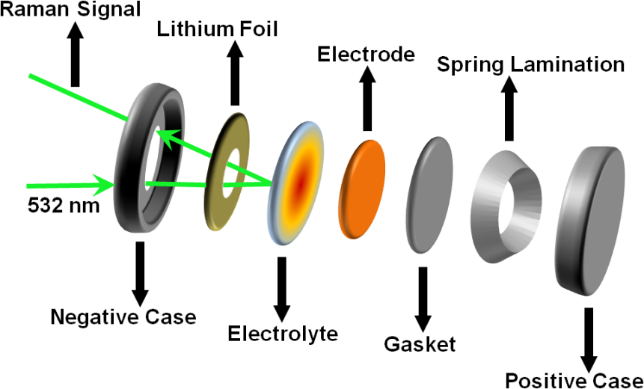


**Supplementary Figure 3 |** The cell configuration for *in-situ* Raman spectroscopic analysis.


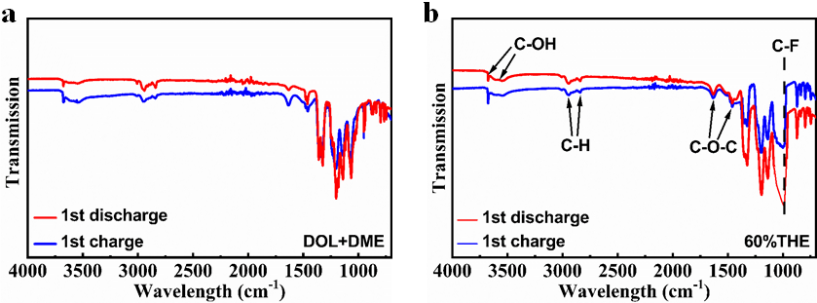


**Supplementary Figure 4 |** FTIR spectra of the Li metals in(a) DOL+DME and(b) 60%THE electrolytes.





**Supplementary Figure 5 |** Cycling performance of the Li/LFP batteries with different electrolytes at 1 C.





**Supplementary Figure 6 |** First cycle voltage profiles of the Li/LFP cells with 60%THE electrolyte at various rates.

**
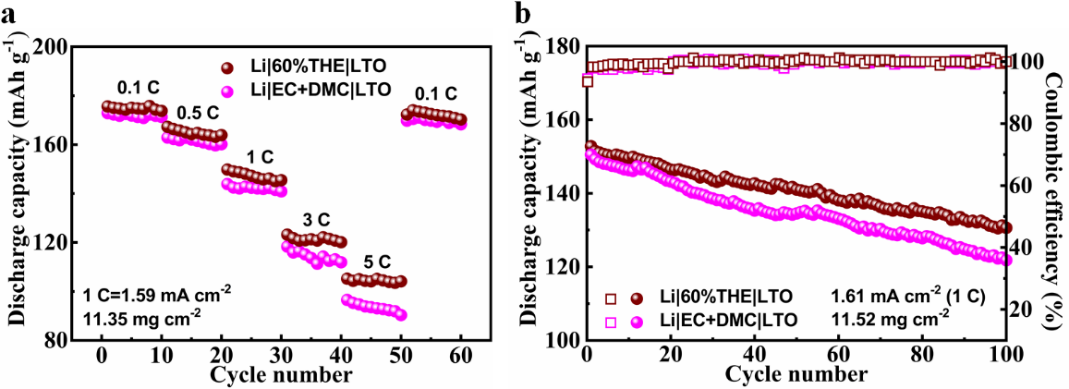
**

**Supplementary Figure 7 |** (a)Rate performance and (b) cycling performance (1 C) of the Li/LTO cells with EC+DMC and 60%THE electrolytes.


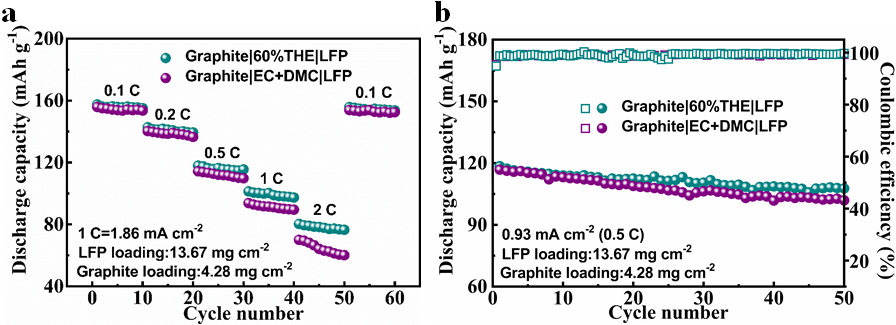


**Supplementary Figure 8 |** (a)Rate performance and (b) cycling performance (0.5 C) of the graphite/LFP cells with EC+DMC and 60%THE electrolytes.


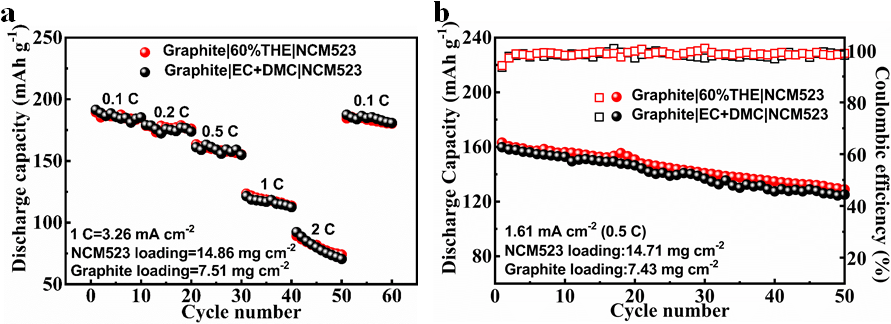


**Supplementary Figure 9 |** (a)Rate performance and (b) cycling performance (0.5 C) of the graphite/NCM523 cells with EC+DMC and 60%THE electrolytes.


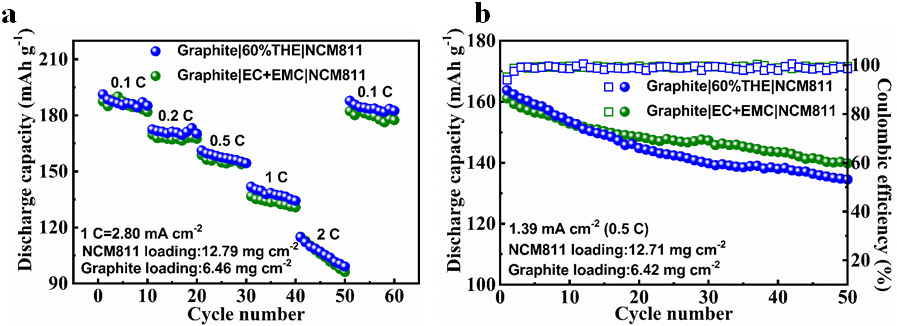


**Supplementary Figure 10 |** (a)Rate performance and (b) cycling performance (0.5 C) of the graphite/NCM811 cells with EC+EMC and 60%THE electrolytes.


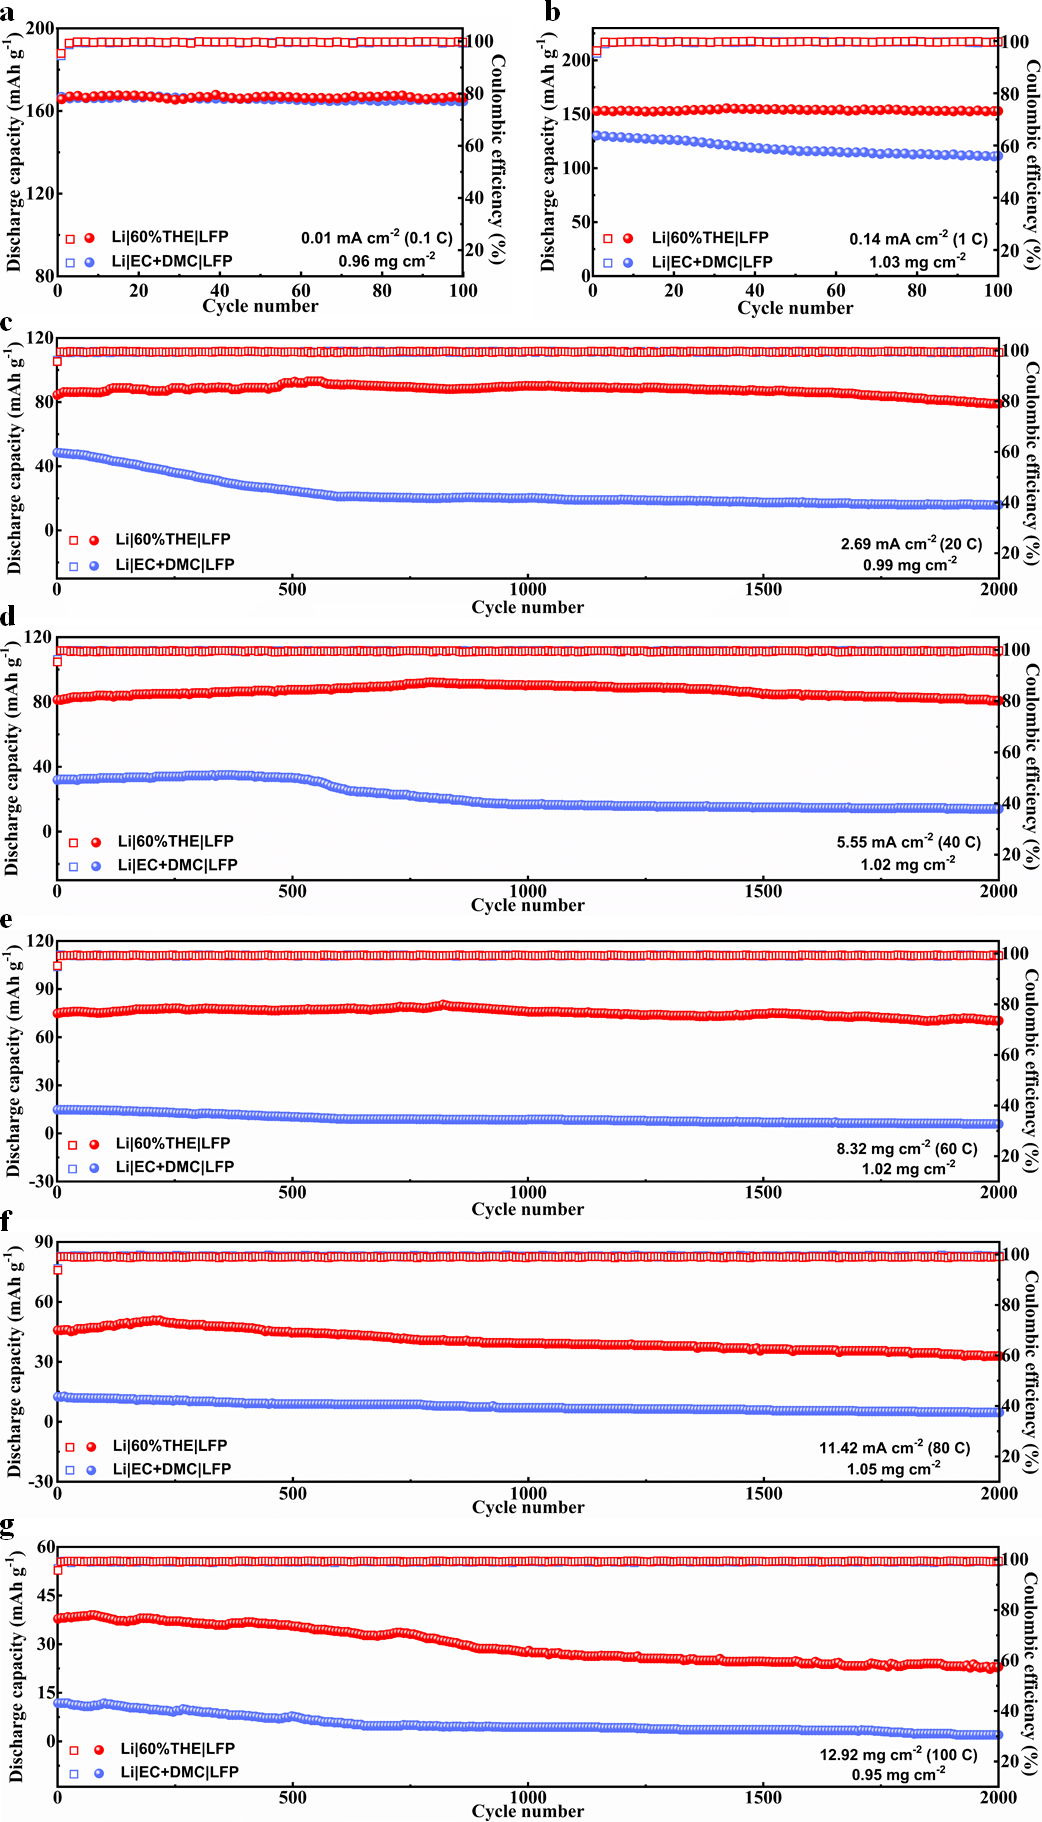


**Supplementary Figure 11 |** Cycling performance of the Li/LFP cells with EC+DMC and 60%THE electrolytes at (a) 0.1 C,(b) 1 C, (c)20 C,(d)40 C,(e)60 C, (f) 80 C and (g) 100 C.


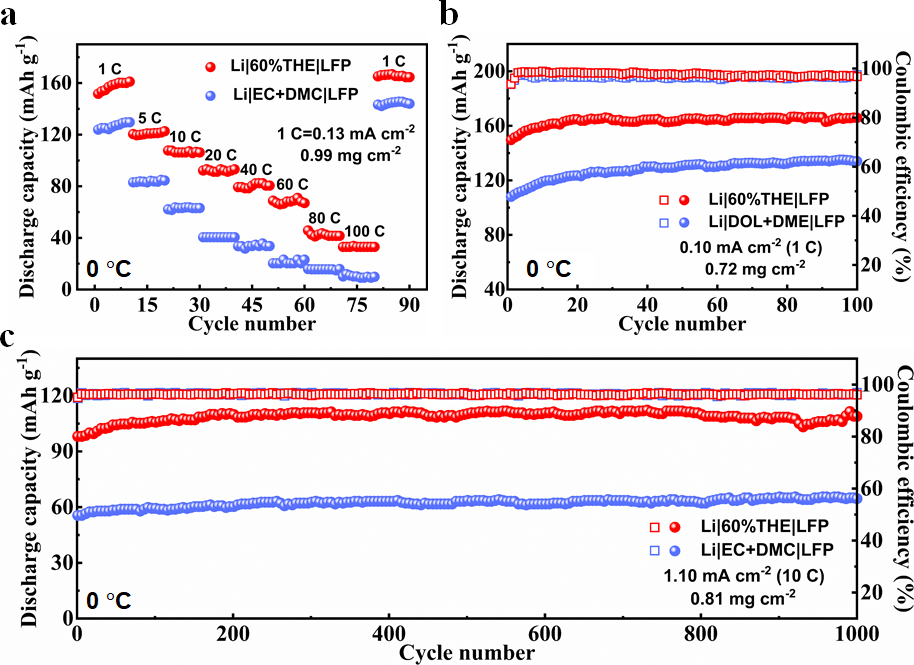


**Supplementary Figure 12 |** (a)Rate performance of the Li/LFP cells with EC+DMC and 60%THE electrolytes at low temperature (0 °C). Low temperature (0 °C) cycle performance of the Li/LFP cells with EC+DMC and 60%THE electrolytes at (b) 1 C and (c) 10 C.


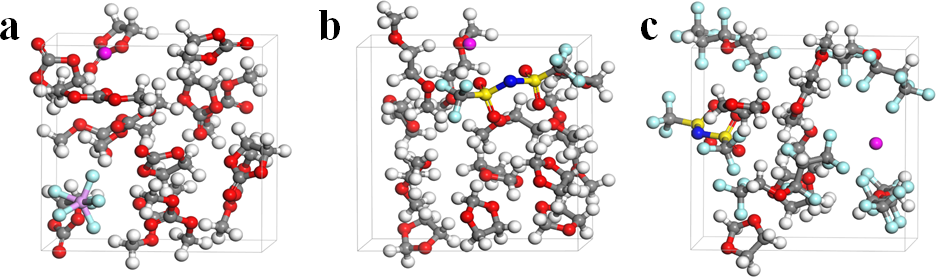


**Supplementary Figure 13 |** The representative AIMD simulation snapshots of (a) EC+DMC, (b) DOL+DME, and (c) 60%THE electrolytes respectively.





**Supplementary Figure 14 |** Electrochemical window of THE solvent.


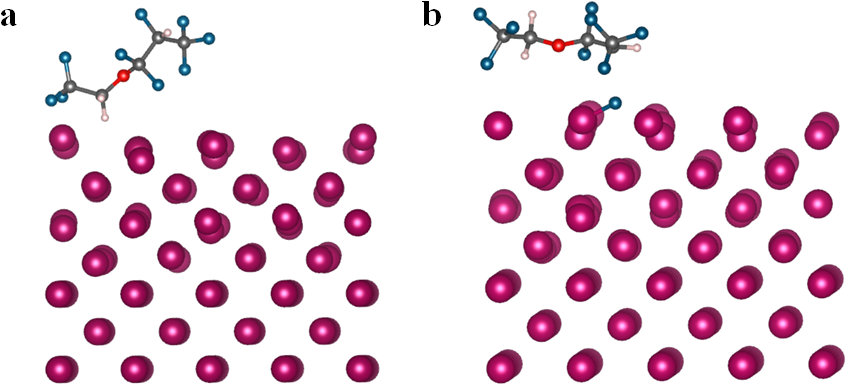


**Supplementary Figure 15 |** C-F bond breaking process of fluorine-rich THE on deposited Li (0 0 1) surface.


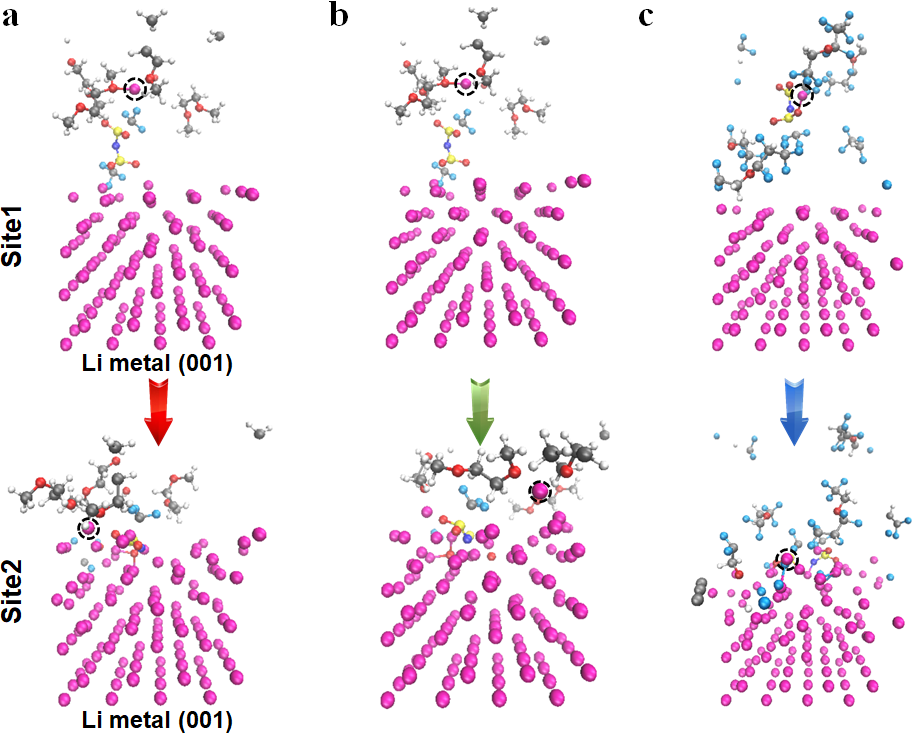


**Supplementary Figure 16 |** Initial and final configurations of **g,** DME, **h,** DOL, and **i,** THE solvents at deposited Li (0 0 1) surface from AIMD calculations. Dashed circles indicate Li transfer reaction from solvents to the deposited Li (0 0 1) surface.

**Table S1**

| Group | | Key component  THE (vt%) | DOL  (vt%) | DME  (vt%) | DMC  (vt%) | EC  (vt%) | LiTFSI  (mol/L) | LiPF6  (mol/L) | | | Name  in our  work |
| --- | --- | --- | --- | --- | --- | --- | --- | --- | --- | --- | --- |
| E1 | 20 | | 40 | 40 | / | / | 1 | | / | 20%THE | |
| E2 | 40 | | 30 | 30 | / | / | 1 | | / | 40%THE | |
| E3 | 45 | | 27.5 | 27.5 | / | / | 1 | | / | 45%THE | |
| E4 | 50 | | 25 | 25 | / | / | 1 | | / | 50%THE | |
| E5 | 55 | | 22.5 | 22.5 | / | / | 1 | | / | 55%THE | |
| **E6** | **60** | | **20** | **20** | / | / | **1** | | / | **60%THE** | |
| E7 | 65 | | 17.5 | 17.5 | / | / | 1 | | / | 65%THE | |
| E8 | 70 | | 15 | 15 | / | / | 1 | | / | 70%THE | |
| E9 | 75 | | 12.5 | 12.5 | / | / | 1 | | / | 75%THE | |
| E10 | 80 | | 10 | 10 | / | / | 1 | | / | 80%THE | |
| R1 | / | | 50 | 50 | / | / | 1 | | / | DOL+DME | |
| R2 | / | | / | / | 50 | 50 | / | | 1 | EC+DMC | |

E1-E10 are self-made electrolytes. Among them, the 60%THE electrolyte exhibits the best comprehensive electrochemical performance, as the key research object. R1 and R2 are commercial electrolytes as references.

**Table S2**

| Rate  (C) | 60%THE  initial  capacity  (mAh g-1) | DOL+DME  initial  capacity  (mAh g-1) | 60% THE  retention  (%) | DOL+DME  retention  (%) | Cycle  number |
| --- | --- | --- | --- | --- | --- |
| 0.1 | 166.8 | 166.5 | 99.9 | 98.7 | 100 |
| 1 | 153.1 | 130.3 | 99.9 | 85.6 | 100 |
| 10 | 93.8 | 63.7 | 94.1 | 7.1 | 5000 |
| 20 | 84.4 | 48.5 | 93.6 | 33.0 | 2000 |
| 40 | 81.3 | 31.8 | 99.4 | 44.2 | 2000 |
| 60 | 74.8 | 14.7 | 93.3 | 39.5 | 2000 |
| 80 | 45.8 | 12.5 | 71.8 | 37.6 | 2000 |
| 100 | 37.8 | 11.8 | 60.8 | 16.9 | 2000 |

**Table S3**

| Rate  (C) | Cycle  number | Retention  (%) | Decay Per Cycle  (%) | Ref.  No |
| --- | --- | --- | --- | --- |
| 1 | 300 | 99.30 | 0.0023 | 1 |
| 1 | 1000 | 94.00 | 0.0060 | 2 |
| 1 | 1000 | 96.60 | 0.0034 | 3 |
| 1 | 800 | 93.30 | 0.0084 | 4 |
| 1 | 890 | 77.57 | 0.0252 | 5 |
| 2 | 500 | 92.20 | 0.0156 | 6 |
| 3 | 3350 | 80.00 | 0.0060 | 7 |
| 5 | 200 | 98.50 | 0.0075 | 8 |
| 5 | 500 | 91.00 | 0.0180 | 9 |
| 10 | 500 | 91.24 | 0.0175 | 10 |
| 10 | 700 | 91.70 | 0.0119 | 11 |
| 10 | 700 | 97.70 | 0.0033 | 12 |
| 10 | 950 | 91.40 | 0.0091 | 13 |
| 10 | 1000 | 89.00 | 0.0110 | 14 |
| 10 | 1000 | 84.00 | 0.0160 | 15 |
| 10 | 1000 | 92.23 | 0.0078 | 16 |
| 10 | 5000 | 60.00 | 0.0080 | 17 |
| 10 | 1000 | 98.4 | 0.0016 | 18 |
| **10** | **5000** | **94.14** | **0.0012** | **our work** |

**Table S4**

| Rate  (C) | 25 °C  60%THE  initial  capacity  (mAh g-1) | 0 °C  60%THE initial  capacity  (mAh g-1) | 60%THE  initial  capacity difference  (mAh g-1) | 25 °C  DOL+DME  initial  capacity  (mAh g-1) | 0 °C  DOL+DME  initial  capacity  (mAh g-1) | DOL+DME  initial  capacity difference  (mAh g-1) |
| --- | --- | --- | --- | --- | --- | --- |
| 1 | 153.2 | 151.7 | 1.5 | 130.8 | 122.8 | 8.0 |
| 5 | 124.1 | 120.4 | 3.7 | 94.2 | 82.4 | 11.8 |
| 10 | 108.7 | 103.8 | 4.9 | 67.5 | 61.3 | 6.2 |
| 20 | 95.1 | 92.4 | 2.7 | 45.8 | 38.8 | 7.0 |
| 40 | 81.7 | 79.8 | 1.9 | 31.5 | 33.6 | -2.1 |
| 60 | 72.8 | 68.9 | 3.9 | 15.2 | 20.3 | -5.1 |
| 80 | 49.2 | 46.7 | 2.5 | 10.1 | 15.8 | -5.7 |
| 100 | 37.2 | 33.5 | 3.7 | 8.1 | 10.2 | -2.1 |

**Table S5**

| Component | DOL+DME  ion conductivity  （S/cm） | 60%THE  ion conductivity  （S/cm） |
| --- | --- | --- |
| LiFePO4 cathode | ~ 19 | ~ 19 |
| electrolyte/cathode interface | ~ 20 | ~ 20 |
| electrolyte | 9.2 | 6.2 |
| electrolyte/anode interface | 21 |  |
| Graphite anode | 22 | 22 |

**Table S6**

| Other cathode and anode | Ion conductivity  （S/cm） |
| --- | --- |
| NCM532 cathode  NCM811 cathode | 23  23 |
| LiCoO2 cathode | 23 |
| Li4Ti5O12 anode | 24 |

**Reference:**

1 Tian, X., Zhou, Y., Wu, G., Wang, P. & Chen, J. Controllable synthesis of porous LiFePO4 for tunable electrochemical Li-insertion performance. *Electrochim. Acta* **229**, 316-324 (2017).

2 Shellikeri, A. *et al.* Hybrid lithium-ion capacitor with LiFePO4/AC composite cathode–long term cycle life study, rate effect and charge sharing analysis. *J. Power Sources* **392**, 285-295 (2018).

3 Zhang, Z. *et al.* An advanced construction strategy of all-solid-state lithium batteries with excellent interfacial compatibility and ultralong cycle life. *J. Mater. Chem. A* **5**, 16984-16993 (2017).

4 Du, G. *et al.* High-performance 3D directional porous LiFePO4/C materials synthesized by freeze casting. *Appl. Surf. Sci.* **453**, 493-501 (2018).

5 Liu, Y. *et al.* Making Li-metal electrodes rechargeable by controlling the dendrite growth direction. *Nat. Energy* **2**, 17083 (2017).

6 Oh, J. *et al.* Melamine foam-derived N-doped carbon framework and graphene-supported LiFePO4 composite for high performance lithium-ion battery cathode material. *ACS Sustainable Chem. Eng.* **7**, 306-314 (2018).

7 Kvasha, A. *et al.* Towards high durable lithium ion batteries with waterborne LiFePO4 electrodes. *Electrochim. Acta* **215**, 238-246 (2016).

8 Li, Y. *et al.* Synthesis of LiFePO4 nanocomposite with surface conductive phase by Zr doping with Li excess for fast discharging. *J. Electrochem. Soc.* **166**, A410-A415 (2019).

9 Gao, L. *et al.* A rationally assembled graphene nanoribbon/graphene framework for high volumetric energy and power density Li-ion batteries. *Nanoscale* **10**, 7676-7684 (2018).

10 Yang, C.-C. *et al.* LATP ionic conductor and *in-situ* graphene hybrid-layer coating on LiFePO4 cathode material at different temperatures. *J. Alloys Compd.* **765**, 800-811 (2018).

11 Longoni, G. *et al.* *In situ* LiFePO4 nano-particles grown on few-layer graphene flakes as high-power cathode nanohybrids for lithium-ion batteries. *Nano Energy* **51**, 656-667 (2018).

12 Oh, J. *et al.* Dual layer coating strategy utilizing N-doped carbon and reduced graphene oxide for high-performance LiFePO4 cathode material. *Electrochim. Acta* **231**, 85-93 (2017).

13 Luo, W.-B., Chou, S.-L., Zhai, Y.-C. & Liu, H.-K. Self-assembled graphene and LiFePO4 composites with superior high rate capability for lithium ion batteries. *J. Mater. Chem. A* **2**, 4927-4931 (2014).

14 Wang, B., Al Abdulla, W., Wang, D. & Zhao, X. S. A three-dimensional porous LiFePO4 cathode material modified with a nitrogen-doped graphene aerogel for high-power lithium ion batteries. *Energy Environ. Sci.* **8**, 869-875 (2015).

15 Hwang, J. *et al.* New liquid carbon dioxide based strategy for high energy/power density LiFePO4. *Nano Energy* **36**, 398-410 (2017).

16 Zou, Y. *et al.* Suppressing Fe-Li antisite defects in LiFePO4/carbon hybrid microtube to enhance the lithium ion storage. *Adv. Energy Mater.* **6**, 1601549 (2016).

17 Yamamoto, K., Suemasa, D., Masuda, K., Aita, K. & Endo, T. Hyperbranched triphenylamine polymer for ultraFast battery cathode. *ACS Appl. Mater. Interfaces* **10**, 6346-6353 (2018).

18 Qiao, Y. Q., Feng, W. L., Li, J. & Shen, T. D. Ultralong cycling stability of carbon-nanotube/LiFePO4 nanocomposites as electrode materials for lithium-ion batteries. *Electrochim. Acta* **232**, 323-331 (2017).

19 Prosini, P., Zane, D. & Pasquali, M. W. Improved electrochemical performance of a LiFePO4-based composite cathode. *Electrochim. Acta* **46**, 3517-3523 (2001).

20 Zhang, F., Wang, C., Zhao, D., Yang, L., Wang, P., Li, W., Wang, B. & Li, S. Synergistic effect of sulfolane and lithium Difluoro(oxalate)borate on improvement of compatibility for LiNi0.8Co0.15Al0.05O2 electrode. *Electrochim. Acta* **337**, 135727 (2020).

21 Han, B. *et al.* Self-regulated phenomenon of inorganic artificial solid electrolyte interphase for lithium metal batteries. Nano. Lett. 20, 4029-4037 (2020).

22 Yoshio, M., Wang, H. & Fukuda, K. Spherical carbon-coated natural graphite as a lithium-ion battery-anode material. *Angew. Chem., Int. Ed. Engl.* **42**, 4203-4206 (2003).

23 Wang, S., Yan, M., Li, Y., Vinado, C. & Yang, J. Separating electronic and ionic conductivity in mix-conducting layered lithium transition-metal oxides. *J. Power Sources* **393**, 75-82 (2018).

24 Kim, S. & Na, B. Electrochemical performance of Li4Ti5O12 with graphene/CNT addition for lithium ion battery. *Korean Chem. Eng. Res.* **55**, 430-435 (2017).
